# Supplementary material for: HOM2 Deletion by CRISPR-Cas9 in Saccharomyces cerevisiae for decreasing Higher Alcohols in Whiskey
Source: Preprints.org preprint supplement (doi:10.20944/preprints202410.1702.v1), 2024-10-24
Supplement: Supplementary file 1 [file supplementary]

**Table S1 Strains and plasmids used in this study**

| Strains or plasmids | Relevant characteristics | | Reference or provider | |
| --- | --- | --- | --- | --- |
| Strains | | | |  |
| XF0 | | diploid yeast strain | | This lab[1] |
| XF0-L | | *∆LEU1-/-,*diploid yeast strain | | This lab[1] |
| XF0-h | | *∆HOM2+/-,*diploid yeast strain | | This study |
| XF0-H | | *∆HOM2-/-,*diploid yeast strain | | This study |
| XF0-LH | | *∆LEU1-/-, ∆HOM2-/-*,diploid yeast strain | | This study |
| Plasmids | | | |  |
| p414 | | TEF1p-Cas9-CYC1t | | This lab |
| ppicz (alpha) | | AOX1-BleoR | | This lab |
| p414-Cas9-BleoR | | TEF1p-Cas9-BleoR-CYC1t | | This lab[1] |
| pUG6 | | kanMX | | This lab |
| P426 | | SNR52p-gRNA-CAN1.Y-SUP4t | | This lab[1] |
| p426-gRNA-*HOM2*-kanMX | | SNR52p-gRNA-HOM2-Y-SUP4t- kanMX | | This study |

**References:**

1. Wang, Z.; He, J.; Lang, S.; Zhou, S. Construction of *LEU1* gene deleted *Saccharomyces cerevisiae* based on CRISPR-Cas9 system for brewing low degree of drunkenness rice wine. *China Brewing* **2024**, 43, 62-67, doi:10.11882/j.issn.0254-5071.2024.04.009.
