# Supplementary material for: HOM2 Deletion by CRISPR-Cas9 in Saccharomyces cerevisiae for decreasing Higher Alcohols in Whiskey
Source: Preprints.org preprint supplement (doi:10.20944/preprints202410.1702.v1), 2024-10-24
Supplement: Supplementary file 3 [file Table S2.docx]

**Table S2 List of the** **Primer sequences used in this study**

| Primers | | sequence (5′→ 3′) a | |
| --- | --- | --- | --- |
| For disruption cassette construction | | | |
| 60bp-F | atcaatacctggtacacctggttttagagctagaaatagc | | |
| 60bp-R | caggtgtaccaggtattgatgatcatttatctttcactgc | | |
| HOM2r-F | GATCATTTATCTTTCACTGC | | |
| HOM2r-R | GTTTTAGAGCTAGAAATAGC | | |
| HT-F1 | TCATTCTGTTGTTGGCAAAT | | |
| HT-R1 | CTTTTAGGCAGACAACAGGAACAATCAATG | | |
| HT-F2 | TCCTGTTGTCTGCCTAAAAGAATACGTCTG | | |
| HT-R2 | CTTGCTAGTAAGATTTCGGC | | |
| For PCR verification | | | |
| HOM2-A | agaaaattgctggtgttttg | | |
| HOM2-D | atcactacgctctctgttta | | |
| For Real-Time qPCR | | |  |
| ACT1-F | TACTCCGTCTGGATTGGTGGTTC | | |
| ACT1-R | AGATGGACCACTTTCGTCGTATT | | |
| HOM2-F | ctcaggtgctggtttctccc | | |
| HOM2-R | tggtctcccattccatcttgtc | | |

a Overlaping sequence for fusion PCR is underlined
